# Supplementary material for: Dyslipidemia and Inflammation as Hallmarks of Oxidative Stress in COVID-19: A Follow-Up Study
Source: Int J Mol Sci. 2022 Dec 5;23(23):15350. doi: 10.3390/ijms232315350 (PMC9736368; doi:10.3390/ijms232315350)
Supplement: Supplementary file 1 [file ijms-23-15350-s001.zip › ijms-1976589-supplementary.pdf]

## **SUPPLEMENTARY MATERIALS**

### **Supplemental material**

Other evaluated cytokines were: brain-derived neurotrophic factor (BDNF), Eotaxin/CCL11, epidermal growth factor (EGF), fibroblast growth factor 2 (FGF-2), granulocyte macrophage colonystimulating factor (GM-CSF), growth-regulated oncogene (GRO) alpha/chemokine (C-X-C motif) ligand 1(CXCL1), hepatocyte growth factor (HGF), nerve growth factor (NGF) beta, leukaemia inhibitory factor (LIF), interferon (IFN) alpha, IFN gamma, interferon gamma-induced protein 10 (IP-10)/ chemokine (C-X-C motif) ligand 10 (CXCL10), monocyte chemoattractant protein 1 (MCP-1)/chemokine (C-C motif) ligand 2 (CCL2), macrophage inflammatory protein 1 (MIP-1) alpha/ (chemokine (C-C-motif) ligand 3(CCL3), regulated upon activation normal T Cell expressed and presumably secreted (RANTES)/ chemokine (C-C motif) ligand 5 (CCL5), stromal-cell derived factor 1 (SDF-1) alpha/CXCL12, tumoral necrosis factor (TNF) alpha, TNF beta/lymphotoxin alpha (LTA), platelet-derived growth factor (PDGF)- BB, placental growth factor (PIGF-1), stem cell factor (SCF), vascular endothelial growth factor (VEGF)-A and VEGF-D.

## SUPPLEMENTARY TABLE

**Table S1.** Baseline characteristics of the global COVID-19 population

|                                         | <b>Global<br/>(n =108)</b> |
|-----------------------------------------|----------------------------|
| <b>Baseline characteristics</b>         |                            |
| <b>Age, years</b>                       | 68.5 [59-75.5]             |
| <b>Male</b>                             | 62 (57.4)                  |
| <b>CAD</b>                              | 10 (9.3)                   |
| <b>CKD<sup>a</sup></b>                  | 3 (2.8)                    |
| <b>Diabetes mellitus</b>                | 19 (17.6)                  |
| <b>Dyslipidaemia<sup>b</sup></b>        | 36 (35.6)                  |
| <b>Hypertension</b>                     | 50 (46.3)                  |
| <b>Obesity<sup>c</sup></b>              | 10 (9.3)                   |
| <b>Prior Lung disease<sup>d</sup></b>   | 19 (18.8)                  |
| <b>Neurological disease<sup>e</sup></b> | 3 (2.8)                    |
| <b>Chronic treatment</b>                |                            |
| <b>Antiplatelets</b>                    | 14 (13.9)                  |
| <b>Anticoagulants</b>                   | 10 (9.9)                   |
| <b>Beta-blockers</b>                    | 12 (11.2)                  |
| <b>RAAS inhibitors</b>                  | 33 (31.1)                  |
| <b>Statin</b>                           | 33 (32.7)                  |

Values are expressed as median (interquartile range) or n (%).

**Abbreviations:** CAD: coronary artery disease; CKD = chronic kidney disease

<sup>a</sup> Defined as glomerular filtration rate <60 ml/min or need of intermittent renal replacement therapy

<sup>b</sup> Defined as chronic lipid lowering treatment (> 3 months)

<sup>c</sup> Defined as body mass index  $\geq 30$  kg/m<sup>2</sup>

<sup>d</sup> Includes chronic obstructive pulmonary disease and other respiratory conditions

<sup>e</sup> Includes stroke and other neurological conditions

**Table S2.** Correlation analysis of lipid peroxidation, lipid profiles and cytokines at the time of admission

|                          | Lymphocytes | CRP      | Ferritin | IL-1 $\beta$ | IL1RA    | IL-6    | IL-18    | IL-17 $\alpha$ | IFN $\gamma$ | IP10     | LPO      |
|--------------------------|-------------|----------|----------|--------------|----------|---------|----------|----------------|--------------|----------|----------|
| <b>Total cholesterol</b> | 0.393**     | -0.242*  | -0.032   | -0.237*      | -0.393** | -0.223* | -0.373** | -0.177         | 0.067        | -0.429** | -0.345** |
| <b>HDL-c</b>             | 0.266**     | -0.175   | -0.053   | -0.243*      | -0.300** | -0.201* | -0.290*  | -0.199*        | -0.016       | -0.412** | -0.319** |
| <b>LDL-c</b>             | 0.386**     | -0.296** | -0.132   | -0.161       | -0.332** | -0.143  | -0.306*  | -0.094         | -0.021       | -0.376** | -0.213*  |
| <b>Triglycerides</b>     | -0.107      | 0.246*   | 0.331**  | 0.130        | 0.139    | 0.112   | 0.127    | 0.131          | -0.142       | 0.127*   | 0.130    |
| <b>Lymphocytes</b>       | NA          | 0.017    | -0.213*  | -0.218*      | -0.264*  | 0.079   | -0.241*  | -0.214*        | 0.135        | -0.473** | -0.427** |
| <b>LPO</b>               | -0.427**    | 0.005    | 0.233*   | 0.192*       | 0.314**  | 0.242** | 0.329*   | 0.288**        | 0.028        | 0.538*   | NA       |

Significant values \* ( $p < 0.05$ ); \*\* ( $p < 0.001$ ) and were derived from Spearman correlation analysis

**Abbreviations:** CRP: C-reactive protein; FRAP: ferric reducing antioxidant power; HDL-c: high density cholesterol; IL: interleukin; IP-10: interferon- $\gamma$ -inducible protein 10; LDL-c: low density cholesterol; LPO: lipid peroxidation; NA: not applicable

**Table S3.** Mean Change in Plasma Lipid and Lipoprotein concentrations between Baseline and Follow-up levels in COVID-19 survivors

|                                          | Baseline <sup>a</sup> | Follow-up           | p-value <sup>d</sup> |
|------------------------------------------|-----------------------|---------------------|----------------------|
| <b>First follow-up<sup>b</sup></b>       |                       |                     |                      |
| <b>Total cholesterol, mg/dL</b>          | 143 [117-164]         | 197 [166-221]       | <b>&lt;0.001</b>     |
| <b>LDL-c, mg/dL</b>                      | 80.8 [54.5-95.9]      | 117.9 [88.1-138.9]  | <b>&lt;0.001</b>     |
| <b>HDL-c, mg/dL</b>                      | 35.6 [29.1-48.7]      | 51.9 [42.8-65.8]    | <b>&lt;0.001</b>     |
| <b>TG, mg/dL</b>                         | 120 [93-160]          | 115 [90-147]        | 0.418                |
| <b>TC/HDL-c</b>                          | 3.7 [3.2-4.8]         | 3.5 [2.9-4.9]       | 0.470                |
| <b>Ferritin, µg/mL</b>                   | 670 [406-1,164]       | 156 [78-266]        | <b>&lt;0.001</b>     |
| <b>Lymphocytes, cells/mm<sup>3</sup></b> | 1,000 [727-1,285]     | 1,985 [1,500-2,565] | <b>&lt;0.001</b>     |
| <b>CRP, mg/dL</b>                        | 77 [36.5-130.5]       | 1.6 [1-3.7]         | <b>&lt;0.001</b>     |
| <b>Second follow-up<sup>c</sup></b>      |                       |                     |                      |
| <b>Total cholesterol, mg/dL</b>          | 142 [117-162]         | 204 [185-228]       | <b>&lt;0.001</b>     |
| <b>LDL-c, mg/dL</b>                      | 80.5 [61-96]          | 124.6 [106.5-137]   | <b>&lt;0.001</b>     |
| <b>HDL-c, mg/dL</b>                      | 32.3 [29.1-43.7]      | 56 [42-64]          | <b>&lt;0.001</b>     |
| <b>TG, mg/dL</b>                         | 120 [97-154]          | 111 [87-150]        | 0.790                |
| <b>TC/HDL-c</b>                          | 3.8 [3.2-4.8]         | 3.6 [3.2-4.8]       | 0.504                |
| <b>Ferritin, µg/mL</b>                   | 640 [312-1,140]       | 102 [53-218]        | <b>&lt;0.001</b>     |
| <b>Lymphocytes, cells/mm<sup>3</sup></b> | 1,000 [732-1345]      | 2,195 [1,868-2,917] | <b>&lt;0.001</b>     |
| <b>CRP, mg/dL</b>                        | 84 [24.3-140.7]       | 3 [1.1-7.6]         | <b>&lt;0.001</b>     |

**Abbreviations:** CRP: C-reactive protein; HDL-c: high-density cholesterol; LDL-c: low-density cholesterol; NA: not applicable TC: total cholesterol; TC/HDL-c: total cholesterol/high density cholesterol ratio; TG: triglycerides

Values are reported as median (IQR). Significant values ( $p < 0.05$ ) are **bold**

<sup>a</sup> Lipid profiles from 1<sup>st</sup> day of hospital admission

<sup>b</sup> Median follow-up time of the global COVID-19 cohort was 79 [68-93] days

<sup>c</sup> Median follow-up time of the global COVID-19 cohort was 514 [427-617] days

<sup>d</sup> Wilcoxon signed rank for paired comparisons baseline and follow-up in COVID-19 survivors

## SUPPLEMENTARY FIGURES

**Figure S1.** Mortality risk in patients with COVID-19 according to LDL-c (A) and LPO (B) levels.

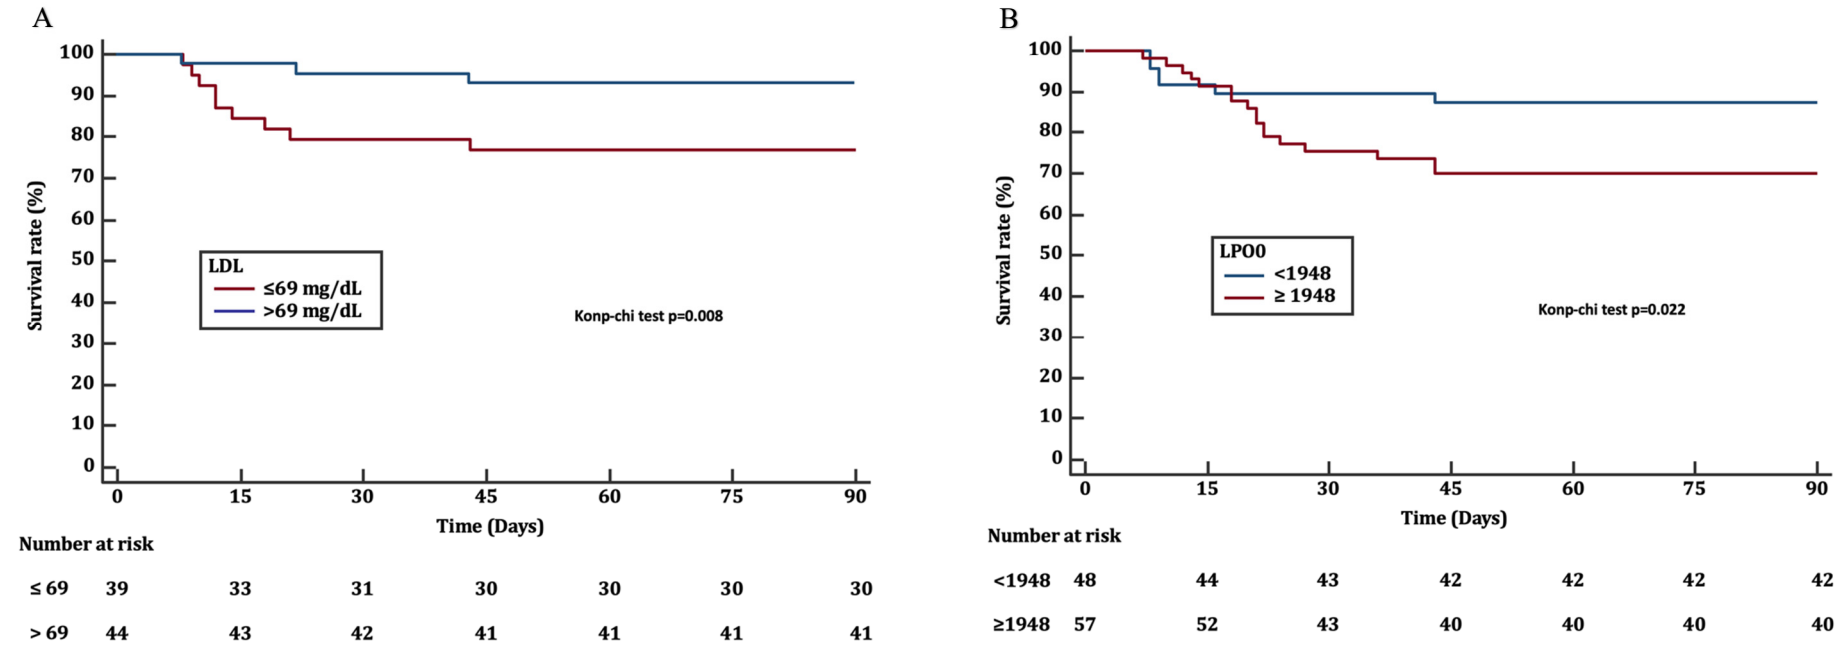

Low LDL (A; **red line**) and high LPO levels (B; **red line**) were associated with a greater 90-day all-cause mortality compared to their counterparts (**blue line**). The number at risk over time in each group is indicated. **Abbreviations:** LDL-c: low-density cholesterol; LPO: lipid peroxidation
